# Supplementary material
Source: PubMed Central journal article supplement (PMC3234873)
Supplement: supp_M111.227553_jbc.M111.227553-1.pdf [file supp_M111.227553_jbc.M111.227553-1.pdf]

## Figure S1 Comparison of Mb with the exogenous hypoxia marker Pimonidazole

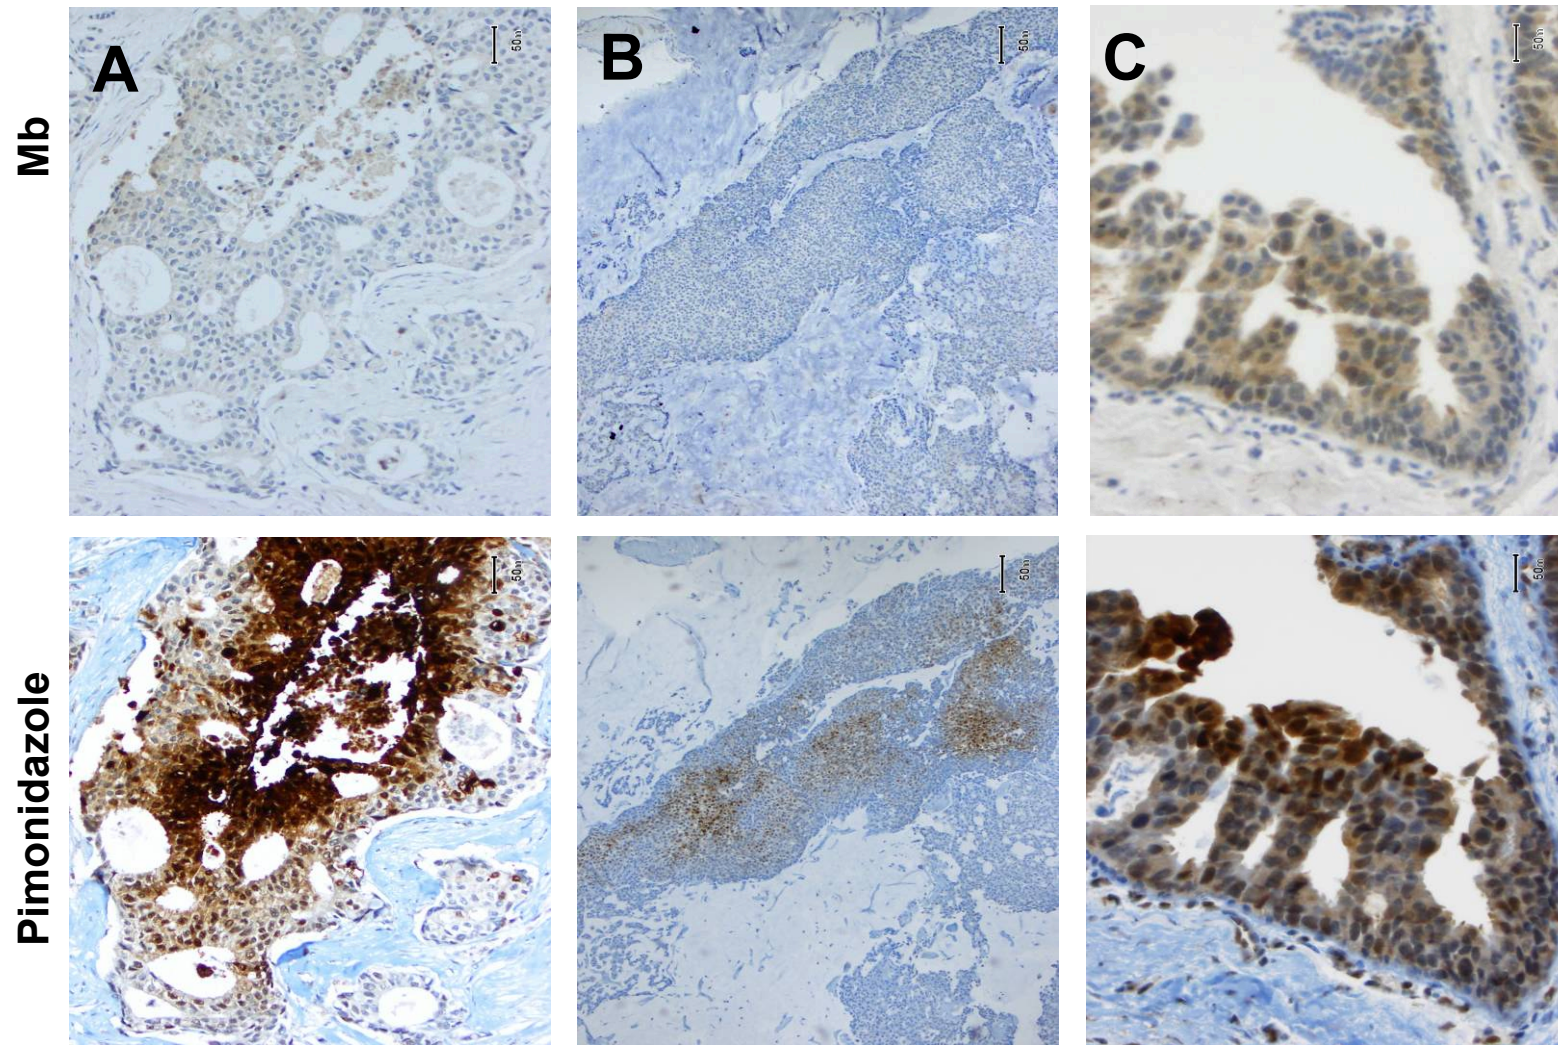

Two sequential sections of three breast cancer cases (A-C) were immunostained for pimonidazole and MB. Although all three cases were strongly positive for pimonidazole, only one of these cases (C), a DCIS, showed a co-localization of MB.

**Figure S2 Lack of hypoxic induction of Mb in the normal Breast cell line MCF12A**

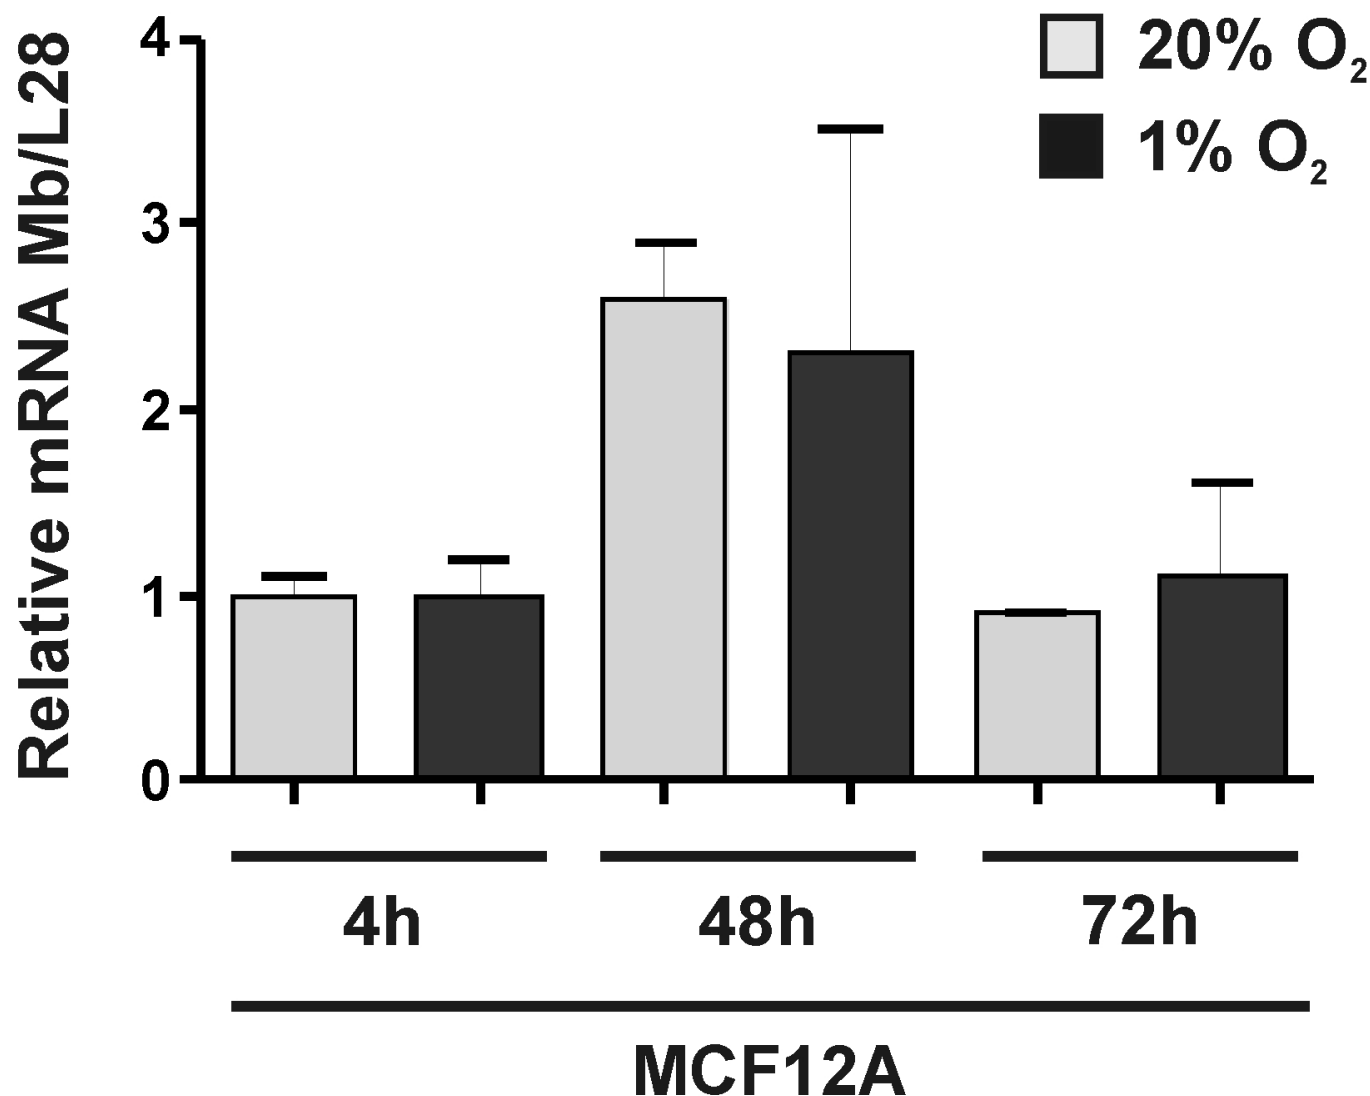

Cells subjected to normoxia or hypoxia (1% O<sub>2</sub>) for 4, 48, 72 hours respectively were analysed for Mb mRNA expression, clearly illustrating the lack of hypoxic induction of Mb in this cell line model of benign breast epithelium.
